# Supplementary material for: Risk prediction in patients with low-flow, low-gradient aortic stenosis and reduced ejection fraction undergoing TAVI
Source: HighWire-hosted journal article supplement (doi:10.1136/openhrt-2021-001912), 2022-01-01

## Supplementary material

### Supplementary tables:

**Supplemental Table S1:** Boundaries for AVCd according to sex-specific tertiles

|               | AVCd tertiles           | Boundaries (mm <sup>3</sup> calcium / cm <sup>2</sup> ) | N   |
|---------------|-------------------------|---------------------------------------------------------|-----|
| <b>male</b>   | 1 <sup>st</sup> tertile | 0.58 - 62.45                                            | 149 |
|               | 2 <sup>nd</sup> tertile | 62.45 - 120.55                                          | 149 |
|               | 3 <sup>rd</sup> tertile | 120.55 - 641.29                                         | 150 |
| <b>female</b> | 1 <sup>st</sup> tertile | 4.97 - 51.04                                            | 90  |
|               | 2 <sup>nd</sup> tertile | 51.04 - 96.15                                           | 90  |
|               | 3 <sup>rd</sup> tertile | 96.15 - 724.53                                          | 90  |

Abbreviations: *AVCd* = aortic valve calcification density

**Supplemental Table S2:** Additional procedural outcome

| Procedural data and outcomes      | Study population (N=718) |
|-----------------------------------|--------------------------|
| THV size (mm)                     | 27.0 (26.0, 29.0)        |
| Oversizing (%)                    | 14.1 (5.4, 25.9)         |
| Predilation                       | 274 (72.1)               |
| Postdilation                      | 115 (30.3)               |
| Cerebral embolic protection       | 35 (9.2)                 |
| P mean after TAVI (mmHg)          | 7.1 (5.0, 10.0)          |
| EOA after TAVI (cm <sup>2</sup> ) | 1.7 (1.4, 2.0)           |

Abbreviations: *AKIN* = acute kidney injury network, *EOA* = effective orifice area, *P mean* = mean transvalvular pressure gradient, *TAVI* = transcatheter aortic valve implantation, *THV* = transcatheter heart valve

**Supplementary figure legends:****Supplemental Figure S1:**

Distribution of center-specific aortic valve calcification density (AVCd) measurements

**Supplemental Figure S2:**

Distribution of RELiEF TAVI score points across the study population

**Supplemental figures:****Supplemental Figure S1:**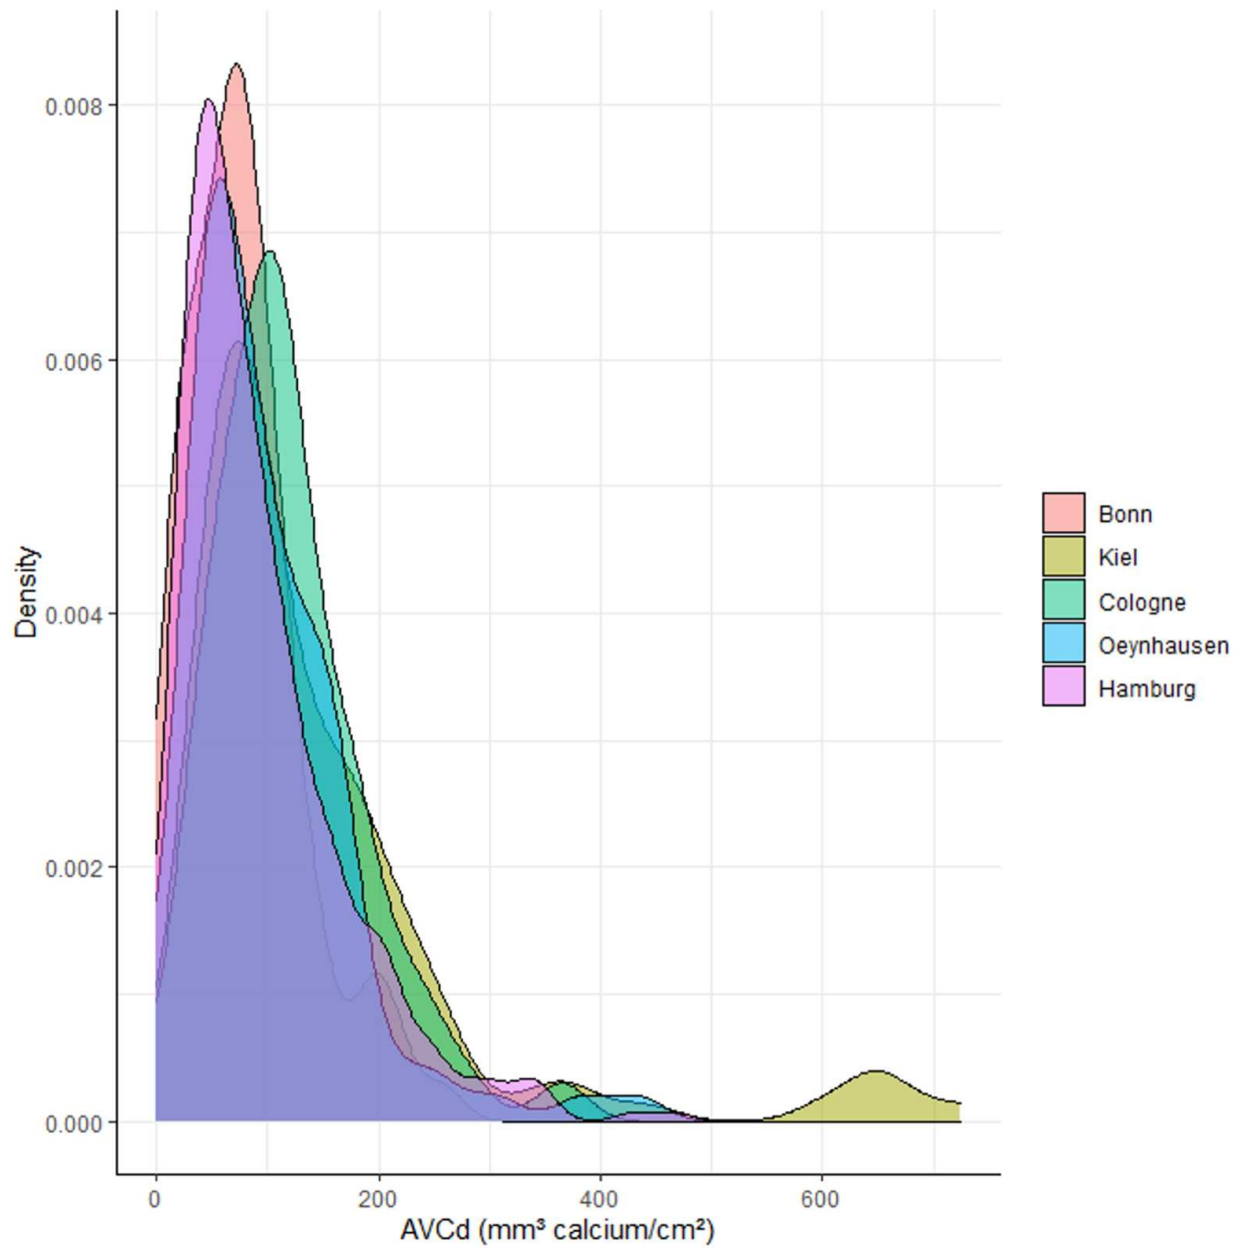

Supplemental Figure S2:

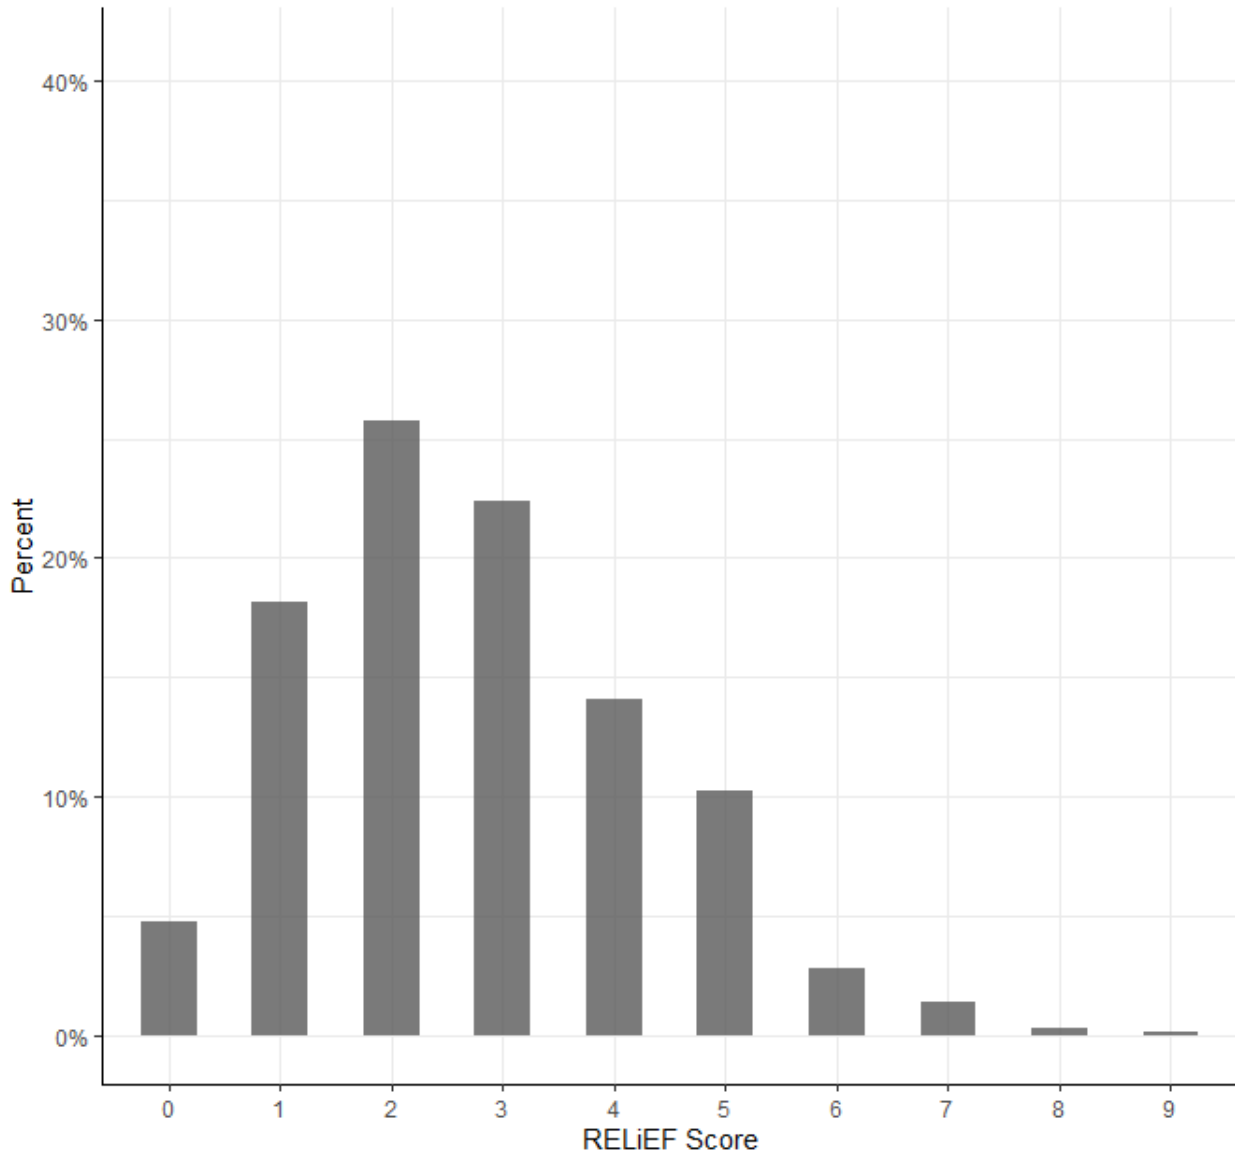

Supplement: openhrt-2021-001912supp001_data_supplement.pdf [file openhrt-2021-001912supp001_data_supplement.pdf]
